# Supplementary material
Source: publisher site journal article supplement (https://www.dovepress.com/article/400782)
Supplement: Supplementary file 1 [file get_supplementary_file.php]

**Supplementary Data**

**
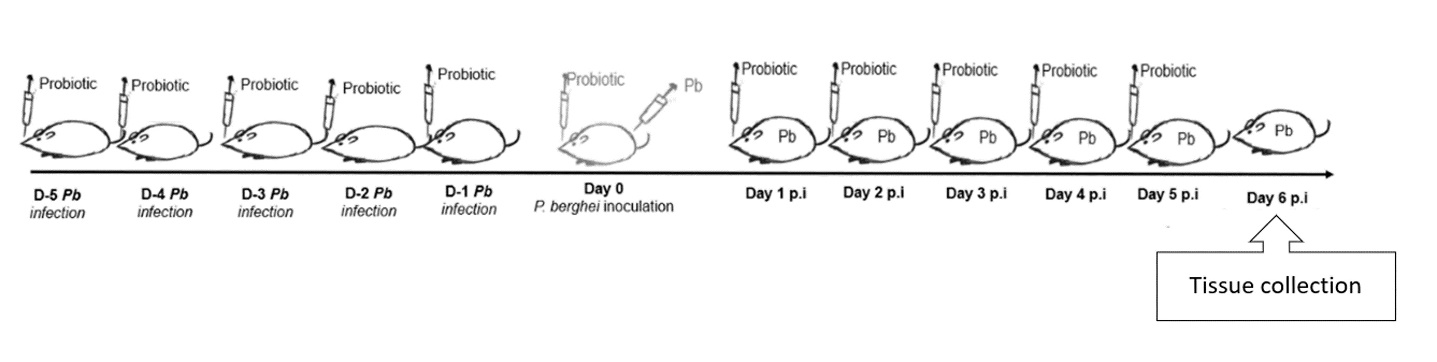
**

**Appendix 1.** Experimental flow and sample collection.

Treatment groups were treated with probiotic from day 5 before *P. berghei* inoculation until day 5 p.i. On day 0, the Pos and treatment groups were injected i.p with infected erythrocytes obtained from donor mice(approximately 5x106 *P. berghei* in 0.2 ml diluted erythrocytes). The negative control group was not infected with *P. berghei* and given PBS orally. On day 6 p.i, all mice were sacrificed for sample collection.

**
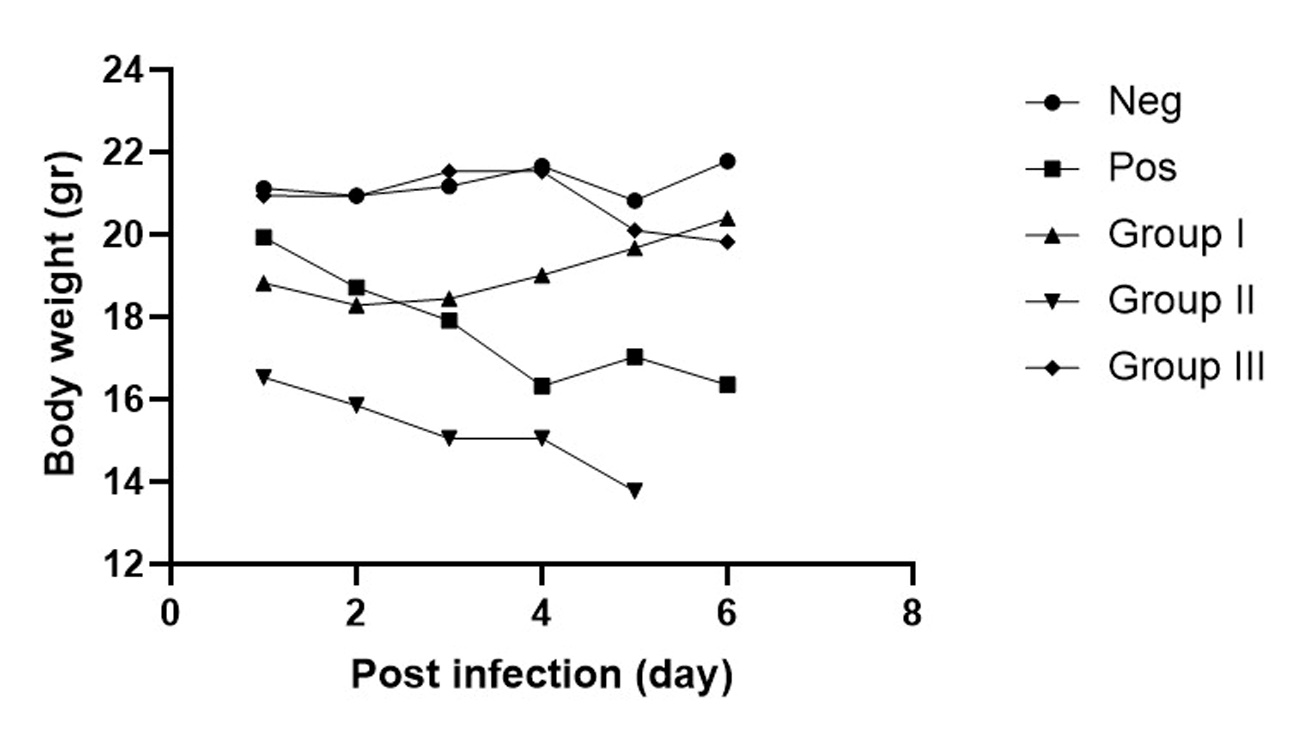
**

**Appendix 2.** Body weight of mice post *P. berghei* inoculation.

The body weight of mice for each group was measured every day. The average body weight of mice for all groups fluctuated post-infection with *P. berghei*. The positive control group showed a lower change in body weight since the fourth day post *P. berghei* infection, but it was not statistically significant (p=0.755).

**
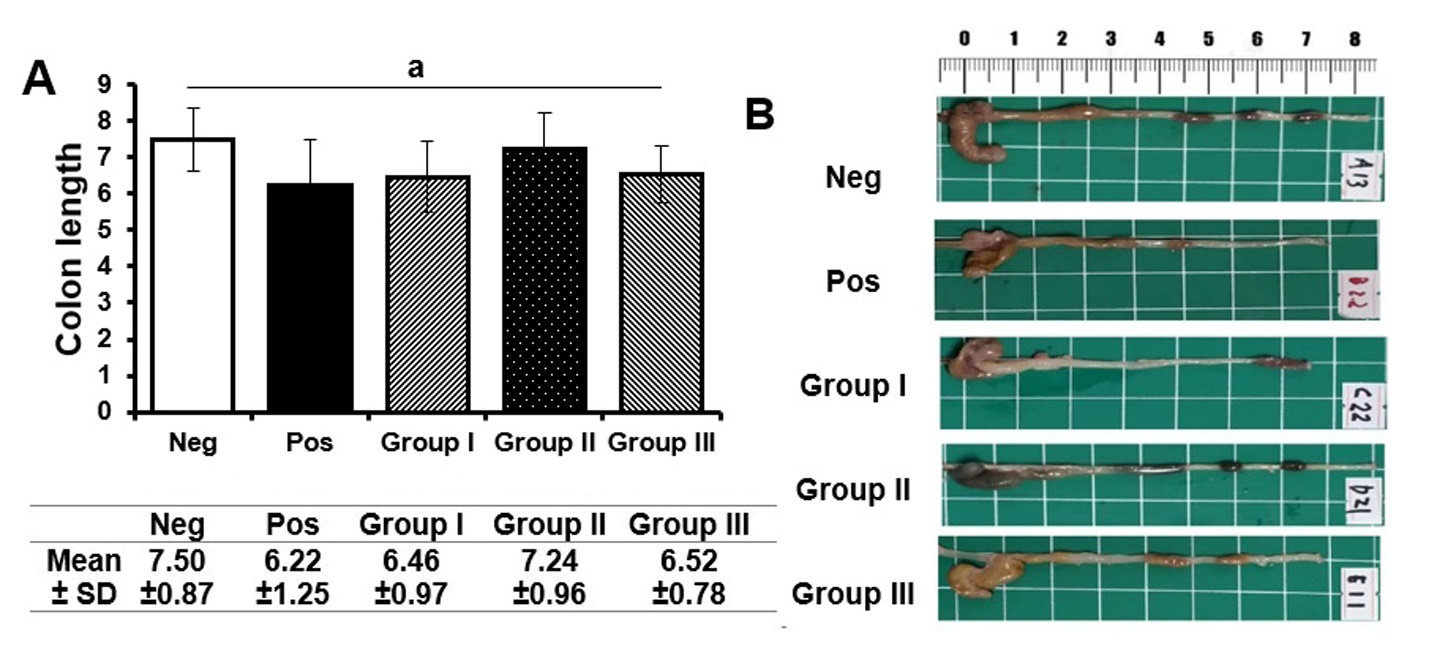
**

**Appendix 3.** Colon length in various administration groups. (A) Average length of colon, (B) colon in each group. There was no significant difference among all groups (p=0.341). Values are expressed as mean ± SD, then analyzed with Kruskall-Walis and Games-Howell multiple comparison test. Abbreviation: negative control group (Neg), PBS; positive control group (Pos), *P. berghei* + PBS; group I, *P. berghei* + *L. casei*; group II, *P. berghei* + *B. longum*; and group III, *P. berghei* + *L. casei* + *B. longum*.
